# Supplementary material for: Safety and efficacy of an engineered hepatotropic AAV gene therapy for ornithine transcarbamylase deficiency in cynomolgus monkeys
Source: PubMed Central journal article supplement (PMC8517016; doi:10.1016/j.omtm.2021.09.005), 2021-09-14
Supplement: mmc1.pdf [file mmc1.pdf]

**OMTM, Volume 23**

**Supplemental information**

**Safety and efficacy of an engineered hepatotropic  
AAV gene therapy for ornithine transcarbamylase  
deficiency in cynomolgus monkeys**

**Julien Baruteau, Sharon C. Cunningham, Berna Seker Yilmaz, Dany P. Perocheau, Simon Eaglestone, Derek Burke, Adrian J. Thrasher, Simon N. Waddington, Leszek Lisowski, Ian E. Alexander, and Paul Gissen**

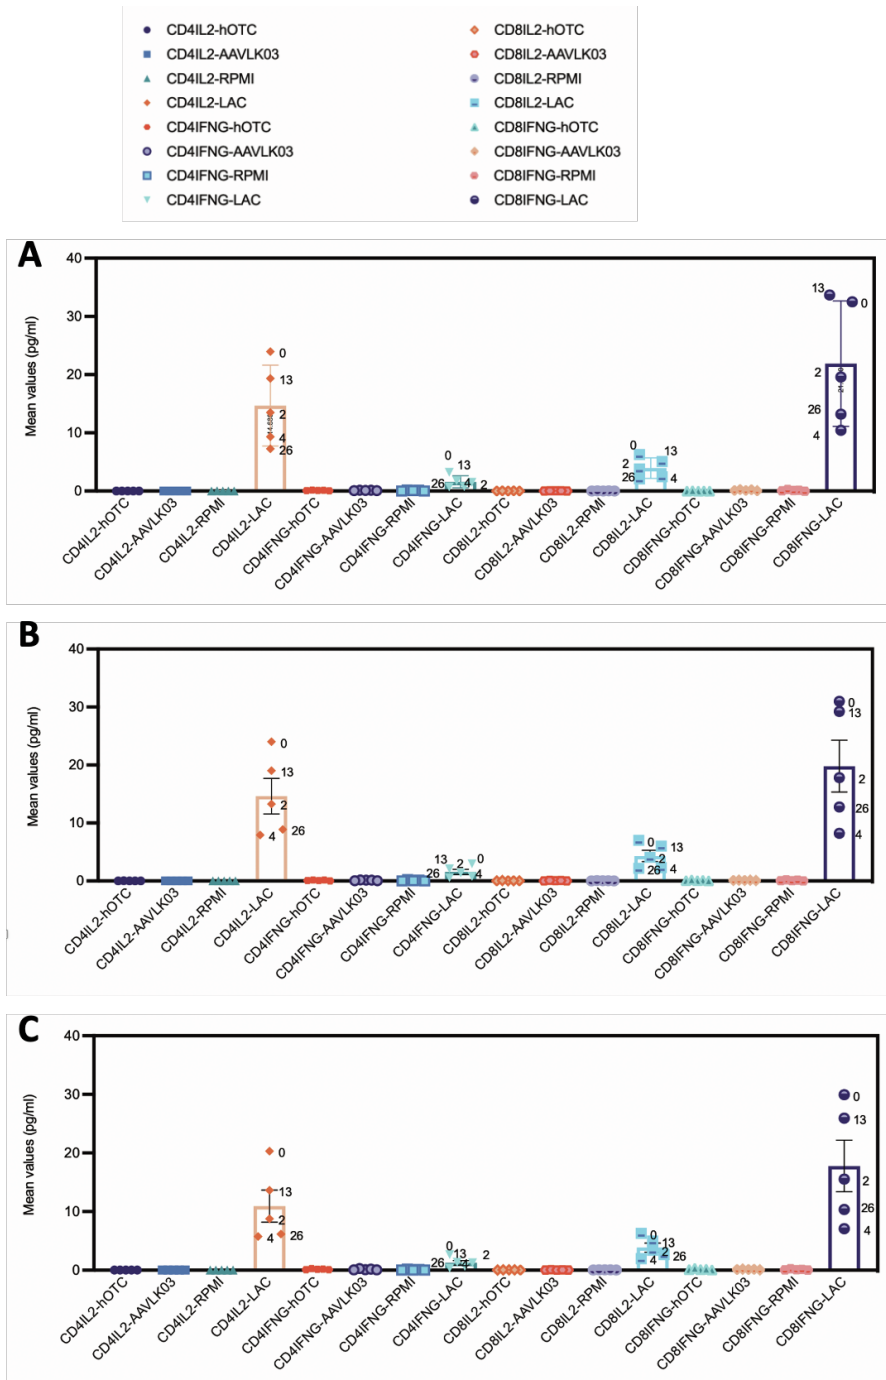

**Supplementary Figure 1. T Cell Responses in PBMCs Treated in Vitro with the Pool of Peptides AAVLK03, hOTC, RPMI and LAC in A) control group B) low dose group C) high dose group.** Horizontal lines display the mean  $\pm$  SEM. Timepoints are mentioned as 0,2,4,13 and 26 weeks for the ones different from zero. hOTC: human OTC protein; CD4: Helper T Cells; CD8: Cytotoxic T cells; IL2: Interleukin 2; IFNG: Interferon gamma; PBMC: Peripheral blood mononuclear cells; RPMI: Roswell Park Memorial Institute cell culture medium ; LAC: Leukocyte Activation Cocktail.

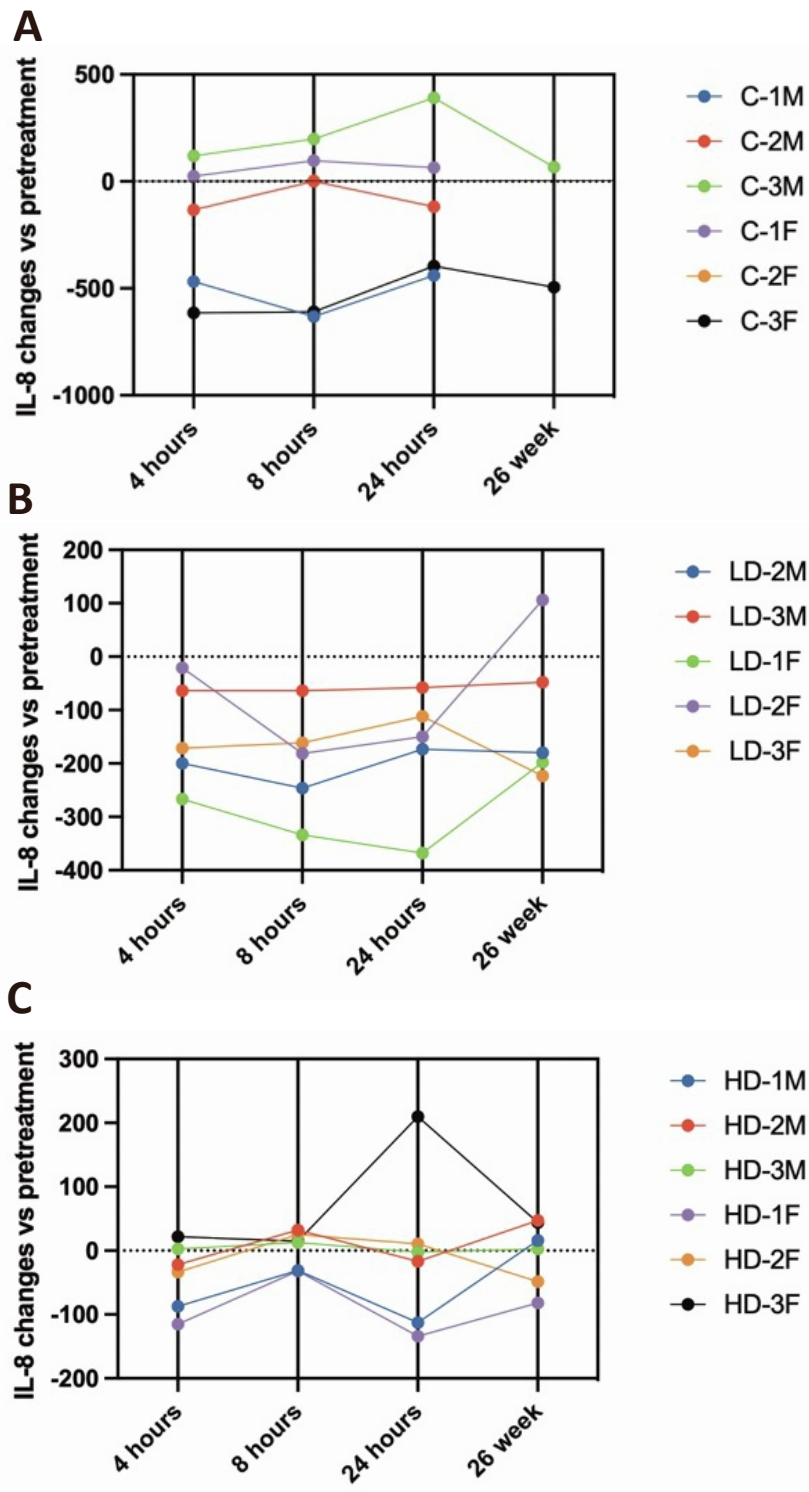

**Supplementary Figure 2. Change in the IL-8 levels at 4 hours, 8 hours, 24 hours and 26 weeks after vector injection versus pretreatment levels in A) control group B) low dose group C) high dose group.** Each line represents the changes of each animal at the mentioned time points. IL-8: Interleukin 8; C: Control group; LD: Low dose group; High dose group; M: Male; F: Female.

### Supplementary Table 1. Clinical laboratory parameters at baseline

C: Control; LD: Low dose; HD: High dose; M:Male; F: Female; Hb: Haemoglobin; Hct: Haematocrit; Ret: Reticulocyte; sPT: Prothrombin time; sAPT: Activated partial thromboplastin time; Cre: Creatinine; Na: Sodium; K: Potassium

|       | Hb (g/dL) | Hct (L/L) | Ret (%) | WBC (x10 <sup>9</sup> /L) | Plt (x10 <sup>9</sup> /L) | sPT (secs) | sAPT (secs) | ALT (U/L) | AST (U/L) | CK (U/L) | Urea (mmol/L) | Cre (µmol/L) | Na (mmol/L) | K (mmol/L) | Albumin (g/L) | Globulin (g/L) |
|-------|-----------|-----------|---------|---------------------------|---------------------------|------------|-------------|-----------|-----------|----------|---------------|--------------|-------------|------------|---------------|----------------|
| C-1M  | 11.9      | 0.427     | 2.18    | 17.22                     | 652                       | 11.3       | 25.8        | 32        | 49        | 126      | 5.4           | 40           | 151         | 3.8        | 43            | 26             |
| C-2M  | 13.7      | 0.482     | 1.14    | 17.14                     | 478                       | 11.6       | 25.7        | 31        | 51        | 201      | 8.21          | 42           | 149         | 4.2        | 44            | 28             |
| C-3M  | 13.2      | 0.483     | 1.16    | 12.27                     | 473                       | 11.2       | 24.9        | 29        | 85        | 210      | 7.56          | 48           | 148         | 2.8        | 47            | 31             |
| C-1F  | 13        | 0.439     | 0.7     | 16.24                     | 384                       | 12.2       | 25.5        | 43        | 42        | 193      | 7.93          | 39           | 147         | 3.8        | 49            | 27             |
| C-2F  | 12.7      | 0.419     | 0.6     | 15.54                     | 414                       | 11.6       | 25.5        | 31        | 43        | 119      | 6.82          | 46           | 147         | 3.7        | 48            | 27             |
| C-3F  | 13        | 0.416     | 0.76    | 9.33                      | 452                       | 12.7       | 24.8        | 40        | 45        | 107      | 9.02          | 47           | 147         | 3.6        | 48            | 27             |
| LD-1M | 13.6      | 0.485     | 1.32    | 15.41                     | 504                       | 11.2       | 24.7        | 37        | 60        | 187      | 10.36         | 55           | 144         | 3.6        | 44            | 34             |
| LD-2M | 12        | 0.408     | 1.59    | 8.19                      | 445                       | 11.6       | 23.8        | 37        | 35        | 83       | 10.69         | 52           | 144         | 3.4        | 44            | 26             |
| LD-3M | 13        | 0.438     | 1.06    | 11.06                     | 673                       | 11.3       | 23.2        | 35        | 32        | 134      | 8.08          | 38           | 141         | 3.8        | 42            | 32             |
| LD-1F | 14.5      | 0.484     | 0.91    | 11.69                     | 486                       | 11.6       | 26.2        | 22        | 29        | 118      | 6.84          | 43           | 154         | 4.3        | 50            | 29             |
| LD-2F | 14        | 0.428     | 0.55    | 13.52                     | 307                       | 12.2       | 29.5        | 26        | 37        | 307      | 8.81          | 52           | 146         | 3.4        | 45            | 27             |
| LD-3F | 13.5      | 0.423     | 0.39    | 10                        | 366                       | 11.4       | 27          | 37        | 46        | 110      | 7.69          | 41           | 147         | 4          | 45            | 26             |
| HD-1M | 12.9      | 0.443     | 1.25    | 13.81                     | 614                       | 12.3       | 23.3        | 36        | 40        | 179      | 6.57          | 55           | 144         | 3.4        | 45            | 29             |
| HD-2M | 12.7      | 0.444     | 1.24    | 18.59                     | 505                       | 11.3       | 27.6        | 47        | 47        | 156      | 6.01          | 55           | 147         | 3.4        | 47            | 30             |
| HD-3M | 11.8      | 0.426     | 1.49    | 14.69                     | 417                       | 12.6       | INS         | 56        | 48        | 115      | 8.06          | 47           | 147         | 3.5        | 47            | 31             |
| HD-1F | 13.8      | 0.443     | 0.78    | 19.2                      | 408                       | 11.7       | 23          | 30        | 38        | 166      | 8.13          | 51           | 147         | 3.7        | 42            | 26             |
| HD-2F | 13        | 0.425     | 0.57    | 14.8                      | 438                       | 11.8       | 24.1        | 24        | 43        | 119      | 8.83          | 58           | 146         | 3.8        | 47            | 25             |
| HD-3F | 13.1      | 0.423     | 0.42    | 12.55                     | 293                       | 10.8       | 22          | 31        | 40        | 182      | 6.42          | 56           | 148         | 4          | 46            | 28             |

**Supplementary Table 2. Clinical laboratory parameters at week 4.** C: Control; LD: Low dose; HD: High dose; M:Male; F: Female; Hb: Haemoglobin; Hct: Haematocrit; Ret: Reticulocyte; sPT: Prothrombin time; sAPT: Activated partial thromboplastin time; Cre: Creatinine; Na: Sodium; K: Potassium

|              | Hb<br>(g/dL) | Hct<br>(L/L) | Ret<br>(%) | WBC<br>(x10 <sup>9</sup> /L) | Plt<br>(x10 <sup>9</sup> /L) | sPT<br>(secs) | sAPT<br>(secs) | ALT<br>(U/L) | AST<br>(U/L) | CK<br>(U/L) | Urea<br>(mmol/L) | Cre<br>(µmol/L) | Na<br>(mmol/L) | K<br>(mmol/L) | Albumin<br>(g/L) | Globulin<br>(g/L) |
|--------------|--------------|--------------|------------|------------------------------|------------------------------|---------------|----------------|--------------|--------------|-------------|------------------|-----------------|----------------|---------------|------------------|-------------------|
| <b>C-1M</b>  | 12           | 0.412        | 1.57       | 9.82                         | 581                          | 11            | 23.5           | 37           | 48           | 128         | 4.86             | 39              | 143            | 3.8           | 44               | 26                |
| <b>C-2M</b>  | 12.4         | 0.414        | 0.95       | 19.07                        | 420                          | 11.4          | 25.3           | 35           | 39           | 212         | 3.73             | 38              | 145            | 4             | 43               | 28                |
| <b>C-3M</b>  | 12.2         | 0.415        | 1.55       | 11.74                        | 383                          | 10.6          | 22.6           | 21           | 53           | 138         | 5.98             | 39              | 144            | 4             | 40               | 35                |
| <b>C-1F</b>  | 11           | 0.371        | 1.22       | 22.46                        | 377                          | 12.6          | 23.2           | 47           | 72           | 260         | 5.3              | 35              | 142            | 4.3           | 39               | 22                |
| <b>C-2F</b>  | 12.2         | 0.411        | 1.13       | 14.41                        | 432                          | 11.4          | 22.7           | 31           | 37           | 195         | 4.84             | 40              | 147            | 3.3           | 45               | 27                |
| <b>C-3F</b>  | 12.1         | 0.401        | 1.47       | 12.04                        | 500                          | 11.6          | 22.4           | 39           | 35           | 174         | 6.8              | 40              | 145            | 3.2           | 42               | 29                |
| <b>LD-1M</b> | 13.5         | 0.45         | 0.55       | 16.29                        | 420                          | 10.4          | 23.3           | 31           | 40           | 191         | 5.25             | 55              | 141            | 3.3           | 40               | 35                |
| <b>LD-2M</b> | 11.7         | 0.387        | 0.71       | 10.78                        | 352                          | 10.9          | 22.1           | 37           | 25           | 135         | 5.92             | 49              | 146            | 3.8           | 40               | 29                |
| <b>LD-3M</b> | 12.9         | 0.413        | 0.88       | 13.92                        | 503                          | 10.7          | 21             | 30           | 20           | 134         | 5.86             | 40              | 144            | 4.1           | 41               | 33                |
| <b>LD-1F</b> | 13.4         | 0.451        | 1.26       | 17.46                        | 459                          | 11.2          | 23.6           | 26           | 27           | 296         | 5.22             | 45              | 145            | 4.3           | 45               | 28                |
| <b>LD-2F</b> | 12.7         | 0.416        | 1.21       | 17.32                        | 402                          | 11            | 25.3           | 26           | 28           | 174         | 5.84             | 49              | 144            | 3.4           | 42               | 31                |
| <b>LD-3F</b> | 13.1         | 0.41         | 0.82       | 13.84                        | 402                          | 10.8          | 25.3           | 33           | 33           | 150         | 5.79             | 39              | 147            | 4.1           | 41               | 31                |
| <b>HD-1M</b> | 12.9         | 0.422        | 1.17       | 11.8                         | 565                          | 11.5          | 21.9           | 43           | 32           | 209         | 5.23             | 52              | 144            | 3.4           | 44               | 29                |
| <b>HD-2M</b> | 12.8         | 0.433        | 0.85       | 11.98                        | 490                          | 10.5          | 24.2           | 65           | 40           | 203         | 4.57             | 53              | 146            | 4             | 47               | 33                |
| <b>HD-3M</b> | 11.9         | 0.405        | 0.96       | 13.9                         | 310                          | 12            | 22             | 41           | 32           | 185         | 5.77             | 50              | 146            | 3.9           | 45               | 33                |
| <b>HD-1F</b> | 12.6         | 0.416        | 1.08       | 14.91                        | 403                          | 10.8          | 22.6           | 40           | 38           | 206         | 5.78             | 47              | 145            | 4.6           | 43               | 27                |
| <b>HD-2F</b> | 12.2         | 0.411        | 1.05       | 16.94                        | 457                          | 11            | 21.6           | 41           | 39           | 211         | 4.5              | 63              | 147            | 4.3           | 42               | 34                |
| <b>HD-3F</b> | 12.9         | 0.418        | 0.92       | 9.81                         | 348                          | 10.2          | 20.9           | 30           | 37           | 226         | 7.84             | 55              | 147            | 4.2           | 46               | 30                |

**Supplementary Table 3. Clinical laboratory parameters at week 13.** C: Control; LD: Low dose; HD: High dose; M:Male; F: Female; Hb: Haemoglobin; Hct: Haematocrit; Ret: Reticulocyte; sPT: Prothrombin time; sAPT: Activated partial thromboplastin time; Cre: Creatinine; Na: Sodium; K: Potassium

|              | Hb<br>(g/dL) | Hct<br>(L/L) | Ret<br>(%) | WBC<br>(x10 <sup>9</sup> /L) | Plt<br>(x10 <sup>9</sup> /L) | sPT<br>(secs) | sAPT<br>(secs) | ALT<br>(U/L) | AST<br>(U/L) | CK<br>(U/L) | Urea<br>(mmol/L) | Cre<br>(µmol/L) | Na<br>(mmol/L) | K<br>(mmol/L) | Albumin<br>(g/L) | Globulin<br>(g/L) |
|--------------|--------------|--------------|------------|------------------------------|------------------------------|---------------|----------------|--------------|--------------|-------------|------------------|-----------------|----------------|---------------|------------------|-------------------|
| <b>C-1M</b>  | 12.1         | 0.402        | 1.09       | 15.67                        | 557                          | 11.6          | 25.6           | 25           | 46           | 66          | 6.44             | 37              | 144            | 3.8           | 42               | 29                |
| <b>C-2M</b>  | 13.4         | 0.437        | 0.64       | 20.88                        | 442                          | 11.3          | 25.9           | 27           | 35           | 80          | 7.66             | 37              | 145            | 3.8           | 44               | 28                |
| <b>C-3M</b>  | 13.3         | 0.451        | 0.63       | 16                           | 410                          | 10.8          | 24.1           | 18           | 52           | 69          | 5.81             | 39              | 140            | 3.9           | 41               | 30                |
| <b>C-1F</b>  | 12.9         | 0.451        | 0.58       | 20                           | 370                          | 12.7          | 24             | 31           | 32           | 110         | 6.81             | 37              | 147            | 4.5           | 46               | 25                |
| <b>C-2F</b>  | 12.4         | 0.419        | 0.58       | 14.41                        | 481                          | 12.2          | 26.5           | 30           | 38           | 90          | 2.62             | 49              | 146            | 3.4           | 46               | 25                |
| <b>C-3F</b>  | 12.3         | 0.409        | 0.75       | 13                           | 545                          | 12.3          | 23.9           | 30           | 34           | 109         | 7.18             | 51              | 142            | 3.6           | 43               | 27                |
| <b>LD-1M</b> | 13.4         | 0.452        | 0.53       | 17.31                        | 527                          | 10.7          | 24.8           | 17           | 40           | 77          | 6.61             | 57              | 142            | 4             | 33               | 31                |
| <b>LD-2M</b> | 12.3         | 0.398        | 0.6        | 10.76                        | 409                          | 11            | 24.5           | 26           | 27           | 75          | 5.08             | 49              | 143            | 4.2           | 42               | 26                |
| <b>LD-3M</b> | 13.7         | 0.429        | 0.43       | 14.28                        | 470                          | 11.1          | 23.6           | 26           | 24           | 178         | 4.05             | 42              | 141            | 3.4           | 42               | 29                |
| <b>LD-1F</b> | 13.8         | 0.458        | 0.65       | 11.15                        | 470                          | 11.3          | 26             | 19           | 31           | 135         | 6.37             | 53              | 145            | 3.9           | 46               | 25                |
| <b>LD-2F</b> | 13.2         | 0.429        | 0.47       | 13.51                        | 345                          | 11.8          | 27.3           | 21           | 30           | 92          | 8.56             | 54              | 144            | 3.6           | 45               | 22                |
| <b>LD-3F</b> | 12.8         | 0.406        | 0.38       | 16.45                        | 378                          | 10.8          | 27.2           | 26           | 39           | 120         | 7.42             | 44              | 143            | 4.2           | 43               | 25                |
| <b>HD-1M</b> | 12.88        | 0.419        | 0.53       | 10.94                        | 531                          | 11.7          | 23.4           | 32           | 33           | 133         | 6.97             | 57              | 144            | 3.3           | 46               | 24                |
| <b>HD-2M</b> | 12.8         | 0.419        | 0.49       | 11.2                         | 423                          | 11            | 27             | 35           | 37           | 88          | 6.64             | 61              | 145            | 3.4           | 47               | 31                |
| <b>HD-3M</b> | 12.4         | 0.406        | 0.45       | 10.12                        | 311                          | 12.1          | 23.2           | 38           | 31           | 94          | 6.37             | 51              | 142            | 3.9           | 46               | 29                |
| <b>HD-1F</b> | 13.5         | 0.452        | 0.67       | 19.04                        | 391                          | 11.7          | 23.7           | 27           | 34           | 112         | 7.49             | 52              | 147            | 3.8           | 45               | 25                |
| <b>HD-2F</b> | 12.6         | 0.413        | 0.46       | 18.78                        | 437                          | 10.9          | 23             | 31           | 34           | 85          | 5.68             | 60              | 144            | 4.1           | 48               | 21                |
| <b>HD-3F</b> | 12.9         | 0.427        | 0.55       | 10.34                        | 289                          | 11.2          | 23.7           | 28           | 38           | 75          | 8.8              | 64              | 145            | 4.1           | 52               | 23                |

**Supplementary Table 4. Clinical laboratory parameters at week 26.** C: Control; LD: Low dose; HD: High dose; M:Male; F: Female; Hb: Haemoglobin; Hct: Haematocrit; Ret: Reticulocyte; sPT: Prothrombin time; sAPT: Activated partial thromboplastin time; Cre: Creatinine; Na: Sodium; K: Potassium

|              | Hb<br>(g/dL) | Hct<br>(L/L) | Ret<br>(%) | WBC<br>(x10 <sup>9</sup> /L) | Plt<br>(x10 <sup>9</sup> /L) | sPT<br>(secs) | sAPT<br>(secs) | ALT<br>(U/L) | AST<br>(U/L) | CK<br>(U/L) | Urea<br>(mmol/L) | Cre<br>(µmol/L) | Na<br>(mmol/L) | K<br>(mmol/L) | Albumin<br>(g/L) | Globulin<br>(g/L) |
|--------------|--------------|--------------|------------|------------------------------|------------------------------|---------------|----------------|--------------|--------------|-------------|------------------|-----------------|----------------|---------------|------------------|-------------------|
| <b>C-1M</b>  | 12.9         | 0.427        | 1.02       | 16.61                        | 572                          | 11.8          | 23.7           | 34           | 46           | 71          | 7.6              | 38              | 145            | 3.8           | 41               | 28                |
| <b>C-2M</b>  | 13.4         | 0.434        | 0.92       | 14.83                        | 410                          | 11.8          | 25.7           | 31           | 35           | 133         | 5.12             | 39              | 146            | 4.3           | 42               | 24                |
| <b>C-3M</b>  | 12.9         | 0.447        | 0.82       | 13.67                        | 388                          | 10.9          | 24.2           | 32           | 53           | 59          | 7.38             | 41              | 150            | 4.2           | 42               | 29                |
| <b>C-1F</b>  | 13           | 0.439        | 0.7        | 16.24                        | 384                          | 12.2          | 25.5           | 35           | 37           | 148         | 6.54             | 35              | 146            | 4.4           | 43               | 26                |
| <b>C-2F</b>  | 12.7         | 0.419        | 0.6        | 15.54                        | 414                          | 11.6          | 25.5           | 34           | 33           | 112         | 4.86             | 48              | 147            | 3.5           | 46               | 23                |
| <b>C-3F</b>  | 13           | 0.416        | 0.76       | 9.33                         | 452                          | 12.7          | 24.8           | 35           | 33           | 108         | 7.52             | 47              | 145            | 3.8           | 42               | 26                |
| <b>LD-1M</b> | 14.4         | 0.485        | 0.56       | 13.48                        | 418                          | 11.4          | 24.4           | 28           | 46           | 291         | 8.15             | 60              | 147            | 3.3           | 42               | 34                |
| <b>LD-2M</b> | 12.5         | 0.408        | 0.59       | 11.41                        | 359                          | 11.1          | 23.1           | 33           | 29           | 91          | 6.63             | 51              | 150            | 4.3           | 40               | 29                |
| <b>LD-3M</b> | 13.9         | 0.437        | 0.5        | 12.67                        | 493                          | 11.2          | 23.4           | 33           | 29           | 290         | 6.52             | 41              | 145            | 3.5           | 43               | 30                |
| <b>LD-1F</b> | 14.5         | 0.484        | 0.91       | 11.69                        | 486                          | 11.6          | 26.2           | 21           | 24           | 154         | 5.37             | 54              | 147            | 3.7           | 46               | 24                |
| <b>LD-2F</b> | 14           | 0.428        | 0.55       | 13.52                        | 307                          | 12.2          | 29.5           | 26           | 38           | 506         | 6.19             | 55              | 146            | 3.6           | 43               | 26                |
| <b>LD-3F</b> | 13.5         | 0.423        | 0.39       | 10                           | 366                          | 11.4          | 27             | 29           | 29           | 104         | 6.69             | 52              | 147            | 4             | 43               | 27                |
| <b>HD-1M</b> | 13.2         | 0.427        | 0.87       | 11.93                        | 504                          | 12.6          | 23.6           | 30           | 31           | 76          | 6.22             | 59              | 147            | 3.3           | 43               | 27                |
| <b>HD-2M</b> | 12.8         | 0.421        | 0.71       | 12.21                        | 462                          | 11.1          | 25.6           | 46           | 39           | 106         | 6.2              | 64              | 149            | 3.2           | 47               | 29                |
| <b>HD-3M</b> | 12.9         | 0.422        | 0.51       | 10.38                        | 318                          | 12.2          | 23.1           | 44           | 31           | 82          | 6.61             | 54              | 145            | 3.9           | 45               | 31                |
| <b>HD-1F</b> | 13.8         | 0.443        | 0.78       | 19.2                         | 408                          | 11.7          | 23             | 25           | 30           | 88          | 8.02             | 53              | 147            | 3.8           | 43               | 27                |
| <b>HD-2F</b> | 13           | 0.425        | 0.57       | 14.8                         | 438                          | 11.8          | 24.1           | 28           | 32           | 230         | 4.46             | 66              | 147            | 3.7           | 42               | 24                |
| <b>HD-3F</b> | 13.1         | 0.423        | 0.42       | 12.55                        | 293                          | 10.8          | 22             | 27           | 34           | 68          | 8.17             | 64              | 148            | 4.3           | 47               | 27                |

**Supplementary Table 5. Neutralisation titres against AAVLK03 capsid (1 in X serum dilution). LD: Low dose group; HD: High dose group**

| Group   | ID animal | At selection | Pre-injection | Week 2 | Week 4 | Week 13 | Week 26 |
|---------|-----------|--------------|---------------|--------|--------|---------|---------|
| Control | 10M       | Neg          | Neg           | Neg    | Neg    | Neg     | Neg     |
|         | 11M       | Neg          | Neg           | Neg    | Neg    | Neg     | Neg     |
|         | 12M       | 5            | 5             | 5      | 5      | 5       | 5       |
|         | 15F       | 5            | 5             | 5      | 5      | 5       | 5       |
|         | 16F       | 5            | 5             | 5      | Neg    | Neg     | Neg     |
|         | 19F       | Neg          | Neg           | Neg    | Neg    | Neg     | Neg     |
| LD      | 4M        | Neg          | 5             | 640    | 640    | 640     | 80      |
|         | 5M        | Neg          | Neg           | 1280   | 1280   | 320     | 160     |
|         | 6M        | Neg          | Neg           | 160    | 10     | Neg     | Neg     |
|         | 13F       | Neg          | Neg           | 40     | 5      | 5       | Neg     |
|         | 17F       | Neg          | Neg           | 640    | 20     | 10      | Neg     |
|         | 18F       | Neg          | Neg           | 160    | 40     | 80      | 10      |
| HD      | 7M        | Neg          | Neg           | 320    | 640    | 1280    | 160     |
|         | 8M        | Neg          | Neg           | 320    | 80     | 80      | 10      |
|         | 9M        | Neg          | Neg           | 160    | 40     | 160     | 160     |
|         | 20F       | Neg          | Neg           | 40     | 1280   | 640     | 80      |
|         | 21F       | Neg          | 5             | 1280   | 640    | 640     | 40      |
|         | 22F       | Neg          | Neg           | 640    | 20     | 20      | 5       |



**Supplementary Table 6. Longitudinal assessment of liver OTC activity.** Data of physiological overexpression of OTC activity, OTC activity, and vector genome copy number over time according to experimental group and gender. The increase of OTC activity was calculated as the difference for each animal injected with AAVLK03.hOTC at each time point compared to the average value of OTC activity for control animals of the same gender at the same time point.

| Group     | ID number | Gender | Increase of OTC activity compared to controls |         |         | OTC activity |         |         | VGCN     |          |          |
|-----------|-----------|--------|-----------------------------------------------|---------|---------|--------------|---------|---------|----------|----------|----------|
|           |           |        | Week 1                                        | Week 13 | Week 26 | Week 1       | Week 13 | Week 26 | Week 1   | Week 13  | Week 26  |
| Control   | 10M       | Male   |                                               |         |         | 52.9         | 37.8    | 68.2    | 0        | 0        | 0        |
|           | 11M       |        |                                               |         |         | 36.2         | 42.7    | 34.7    | 0        | 0        | 0        |
|           | 12M       |        |                                               |         |         | 42.7         | 56.1    | 62.0    | 0        | 0        | 0        |
|           | 15F       | Female |                                               |         |         | 36.8         | 32.3    | 64.8    | 0        | 0        | 0        |
|           | 16F       |        |                                               |         |         | 41.3         | 33.7    | 45.7    | 0        | 0        | 0        |
|           | 19F       |        |                                               |         |         | 62.0         | 36.1    | 83.0    | 0        | 0        | 0        |
| Low dose  | 4M        | Male   | 9.0                                           | -8.7    | 21.9    | 53.0         | 36.8    | 76.8    | 2.56E+06 | 2.38E+05 | 3.34E+05 |
|           | 5M        |        | 5.0                                           | -4.0    | 10.6    | 48.9         | 41.6    | 65.5    | 2.69E+06 | 4.14E+05 | 4.87E+05 |
|           | 6M        |        | -7.7                                          | -9.1    | 7.9     | 36.2         | 36.5    | 62.9    | 2.71E+06 | 7.39E+05 | 9.26E+05 |
|           | 13F       | Female | 1.4                                           | 17.2    | 27.1    | 48.1         | 51.2    | 91.6    | 9.59E+04 | 8.28E+05 | 1.10E+06 |
|           | 17F       |        | 4.0                                           | 8.6     | -5.0    | 50.7         | 42.7    | 59.5    | 1.58E+06 | 9.62E+04 | 1.56E+05 |
|           | 18F       |        | 9.0                                           | 0.8     | -20.3   | 55.7         | 34.8    | 44.2    | 2.91E+06 | 0        | 0        |
| High dose | 7M        | Male   | 5.2                                           | 0.0     | 19.0    | 49.1         | 45.5    | 73.9    | 3.36E+07 | 2.04E+07 | 1.43E+07 |
|           | 8M        |        | 18.9                                          | 6.3     | 5.4     | 62.9         | 51.8    | 60.3    | 2.69E+07 | 2.02E+07 | 1.79E+07 |
|           | 9M        |        | 14.5                                          | 8.8     | -4.3    | 58.5         | 54.3    | 50.7    | 4.13E+07 | 3.24E+07 | 2.28E+07 |
|           | 20F       | Female | -7.3                                          | 15.0    | -1.4    | 39.4         | 49.0    | 63.1    | 2.81E+07 | 1.04E+07 | 9.35E+06 |
|           | 21F       |        | 13.7                                          | 8.6     | -1.9    | 60.4         | 42.6    | 62.6    | 3.14E+07 | 1.46E+07 | 9.83E+06 |
|           | 22F       |        | -6.9                                          | 14.2    | 25.9    | 39.8         | 48.2    | 90.4    | 4.02E+07 | 2.90E+07 | 2.06E+07 |

**Supplementary information** Sequence of codon-optimised human OTC used in AAVLK03.hOTC

ATGCTGTTTAACCTGAGAATCCTGCTGAATAACGCTGCCTTTAGGAACGGACATAACTTCATGGTCCGCAACTTTCGCTGTGGCC  
AGCCTCTCCAGAACAAAGTGCAGCTGAAGGGGAGGGACCTGCTGACCCTGAAAAATTCACAGGAGAGGAAATCAAGTACATGC  
TGTGGCTGTCTGCCGATCTGAAGTTCCGGATCAAGCAGAAGGGCGAATATCTGCCACTGCTCCAGGGCAAAGTCTGGGGATGA  
TCTTCGAAAAGAGGAGTACTCGGACCAGACTGTCAACAGAGACTGGATTCGCTCTGCTGGGAGGACACCCATGCTTTCTGACCAC  
ACAGGACATTCATCTGGGCGTGAACGAGTCACTGACCGACACAGCCCGGGTGCTGAGCAGCATGGCCGATGCCGTGCTGGCACG  
GGTCTACAAACAGAGCGACCTGGATACCCTGGCTAAGGAAGCAAGCATCCCCATCATTAAATGGGCTGTCCGACCTGTATCACCT  
ATCCAGATTCTGGCCGATTACCTGACCCTCCAGGAGCATTATTCTAGTCTGAAAGGCCTGACACTGAGCTGGATTGGGGACGGAA  
ACAATATCCTGCACTCCATTATGATGTCTGCCGCTAAGTTTGGGATGCACCTCCAGGCAGCCACACCAAAGGCTACGAACCCGA  
TGCCAGTGTGACTAAGCTGGCCGAACAGTATGCTAAAGAGAACGGCACTAAGCTGCTGCTGACCAATGACCCCTGGAGGCTGC  
ACACGGAGGCAACGTCCTGATCACTGATACCTGGATCAGCATGGGCCAGGAGGAAGAGAAGAAGAAGCGGCTCCAGGCCTTCC  
AGGGCTACCAGGTGACAATGAAAACCTGCCAAGGTCGCCGCTTCTGATTGGACTTTTCTGCATTGTCTGCCCCGAAAACCTGAAGA  
GGTGGACGATGAGGTCTTCTATTACCTAGGAGCCTGGTGTTCAGAAAGCCGAGAATCGCAAGTGGACAATCATGGCCGTGATG  
GTGTCCTGCTGACTGACTATTCCCCACAGCTGCAGAAGCCTAAGTTTTGA
